# Supplementary material
Source: ML conference proceedings conference paper supplement (https://openreview.net/forum?id=0KAdFd5zku)

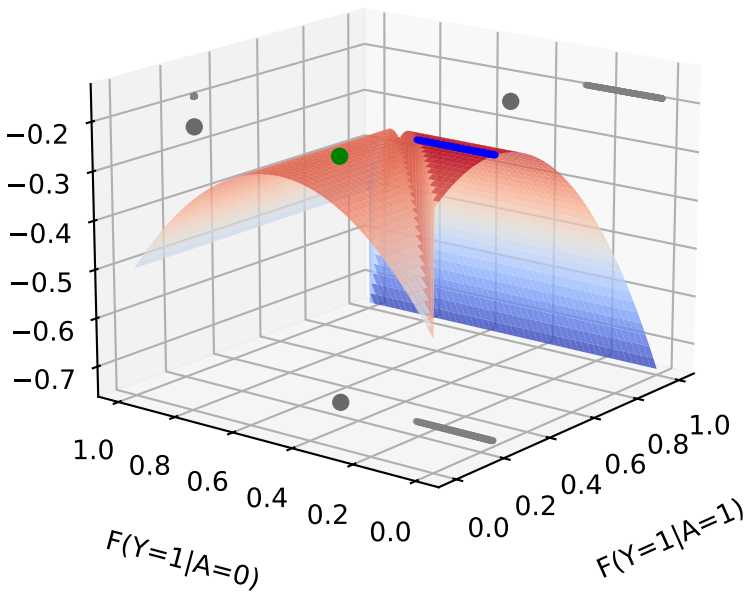

Supplement: supplementary_material [file 1a_expected_brier_score_plot_not_proper.pdf › boeken2025conditional_supplements/figures/1a_expected_brier_score_plot_not_proper.pdf]

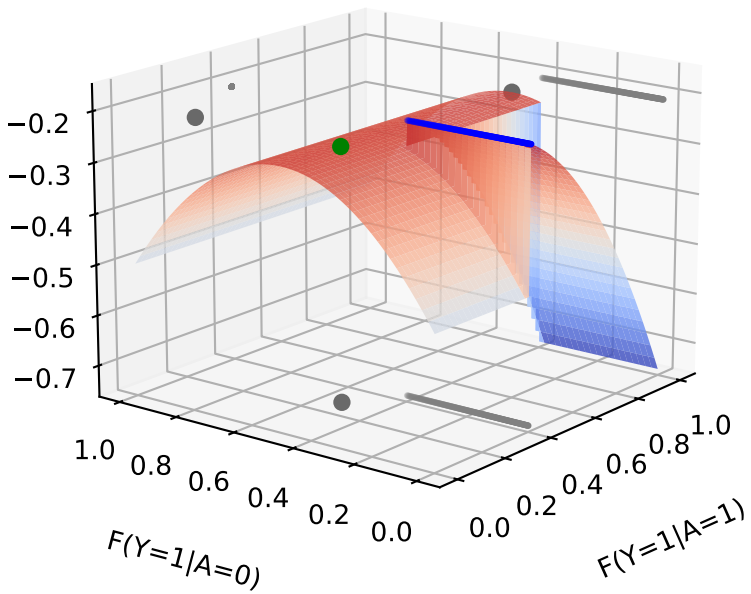

Supplement: supplementary_material [file 1b_expected_brier_score_plot_self_defeating.pdf › boeken2025conditional_supplements/figures/1b_expected_brier_score_plot_self_defeating.pdf]

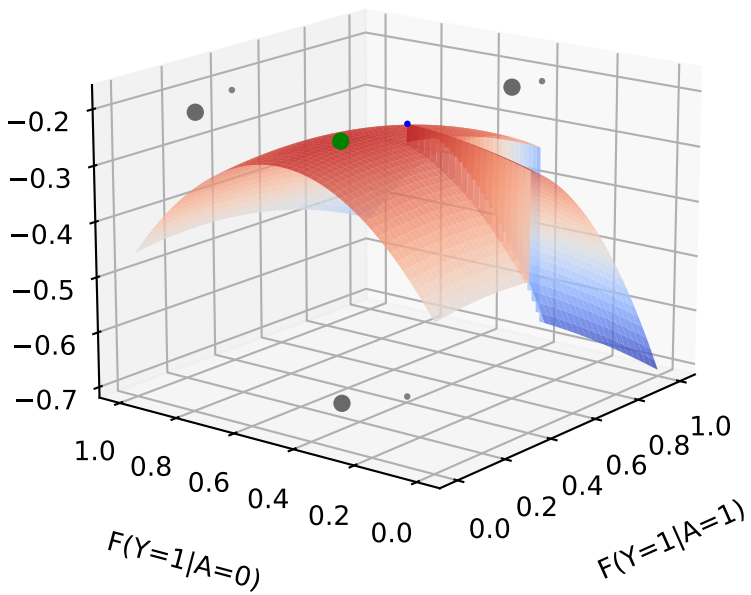

Supplement: supplementary_material [file 1c_expected_brier_score_plot_self_defeating_positivity.pdf › boeken2025conditional_supplements/figures/1c_expected_brier_score_plot_self_defeating_positivity.pdf]

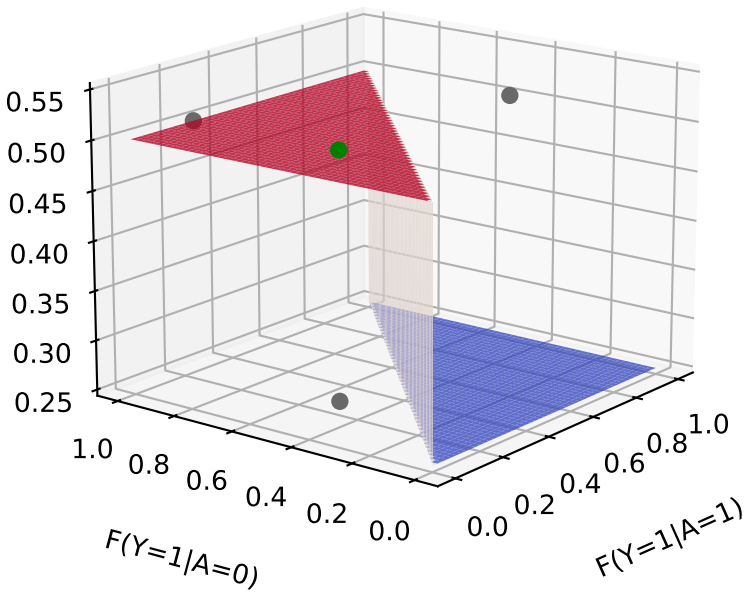

Supplement: supplementary_material [file 2_expected_utility_score_plot.pdf › boeken2025conditional_supplements/figures/2_expected_utility_score_plot.pdf]

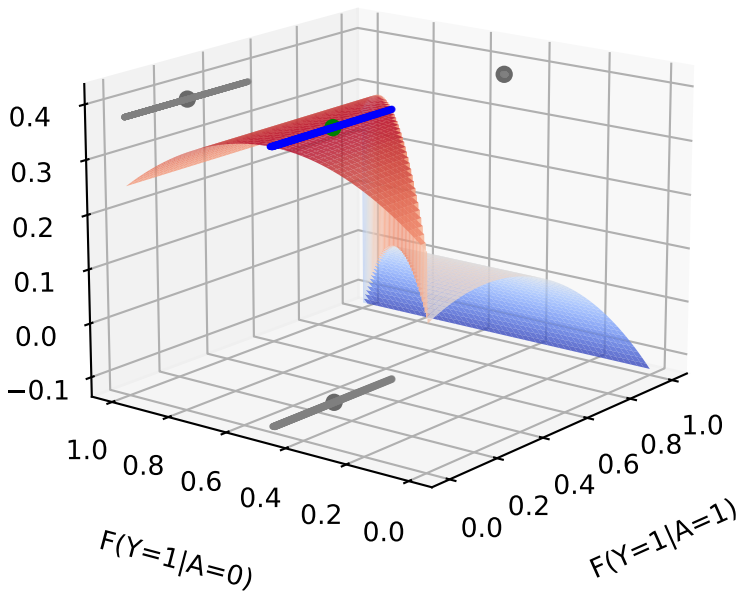

Supplement: supplementary_material [file 2b_expected_utility_plus_brier_score_plot.pdf › boeken2025conditional_supplements/figures/2b_expected_utility_plus_brier_score_plot.pdf]

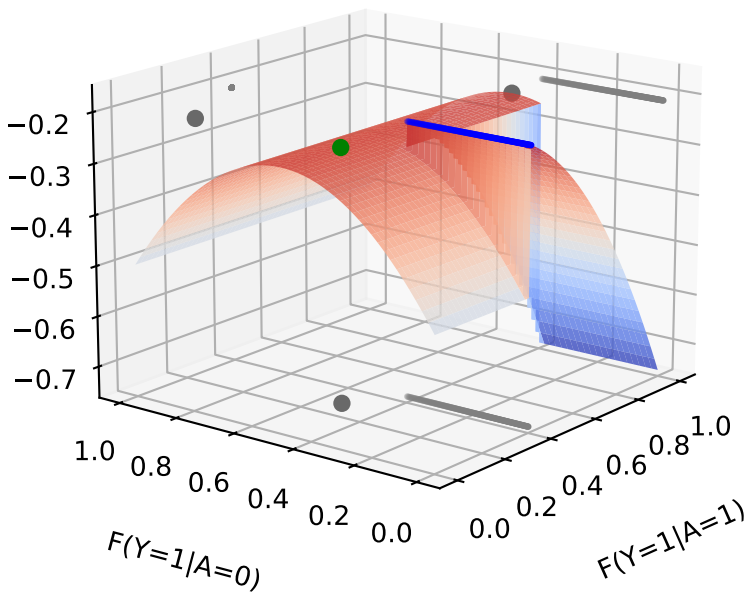

Supplement: supplementary_material [file 3a_expected_brier_score_plot_no_positivity.pdf › boeken2025conditional_supplements/figures/3a_expected_brier_score_plot_no_positivity.pdf]

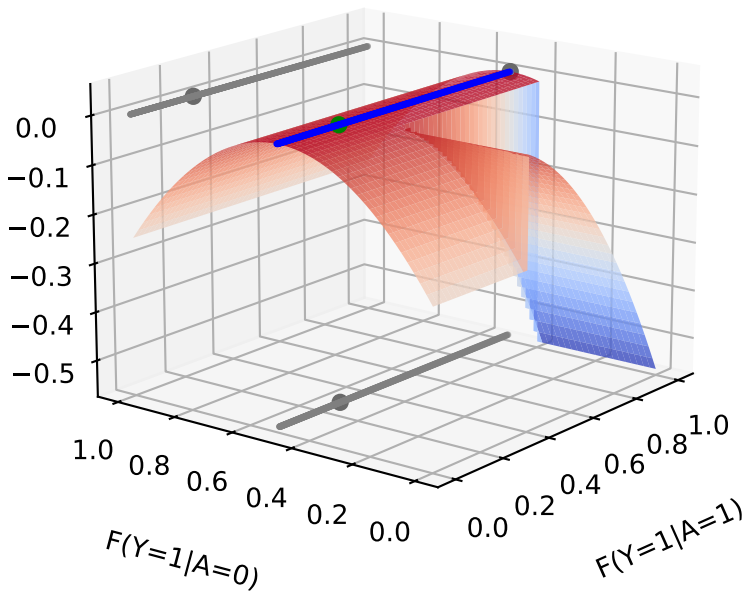

Supplement: supplementary_material [file 3b_expected_brier_divergence_plot_no_positivity.pdf › boeken2025conditional_supplements/figures/3b_expected_brier_divergence_plot_no_positivity.pdf]



Supplement: supplementary_material [file 3c_expected_brier_ipw_score_plot_no_positivity.pdf › boeken2025conditional_supplements/figures/3c_expected_brier_ipw_score_plot_no_positivity.pdf]

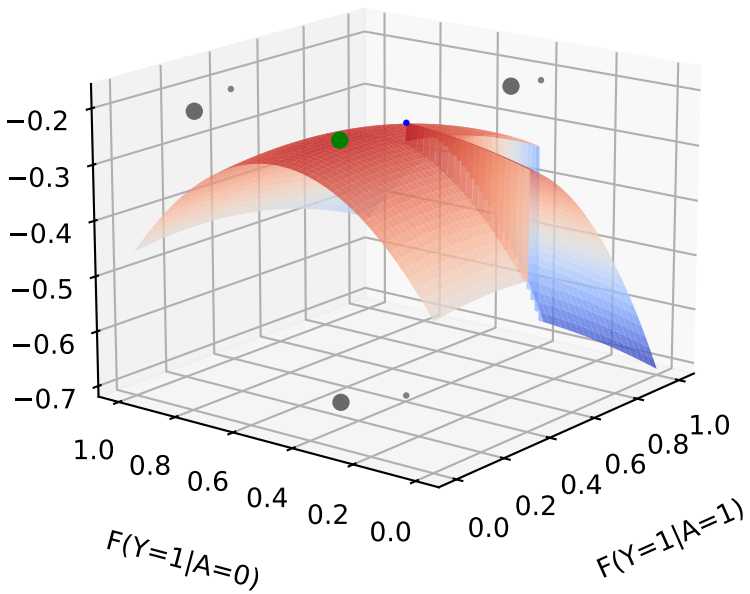

Supplement: supplementary_material [file 4a_expected_brier_score_plot_positivity.pdf › boeken2025conditional_supplements/figures/4a_expected_brier_score_plot_positivity.pdf]

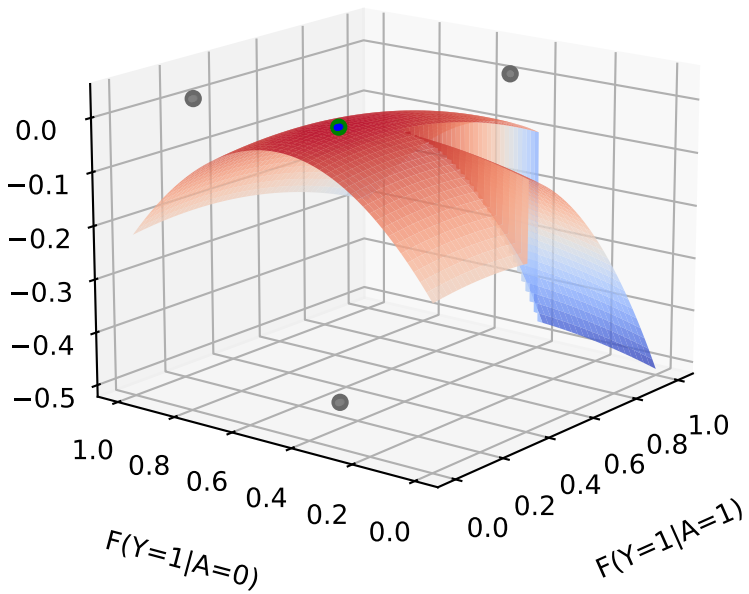

Supplement: supplementary_material [file 4b_expected_brier_divergence_plot_positivity.pdf › boeken2025conditional_supplements/figures/4b_expected_brier_divergence_plot_positivity.pdf]

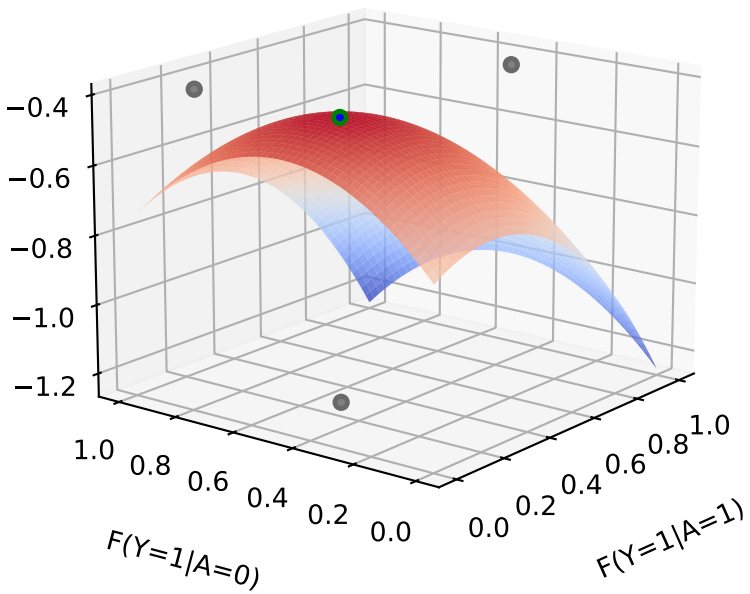

Supplement: supplementary_material [file 4c_expected_brier_ipw_score_plot_positivity.pdf › boeken2025conditional_supplements/figures/4c_expected_brier_ipw_score_plot_positivity.pdf]

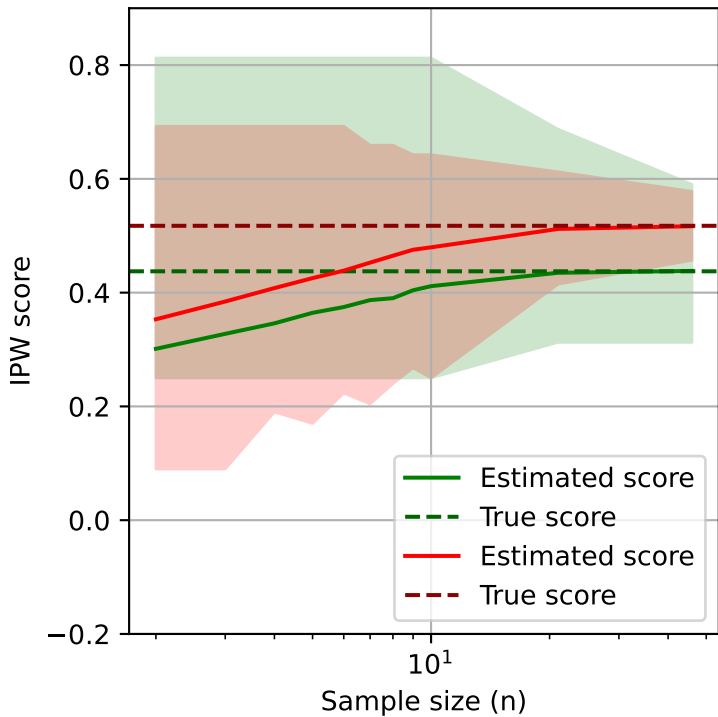

Supplement: supplementary_material [file app_variance_of_IPW.pdf › boeken2025conditional_supplements/figures/app_variance_of_IPW.pdf]

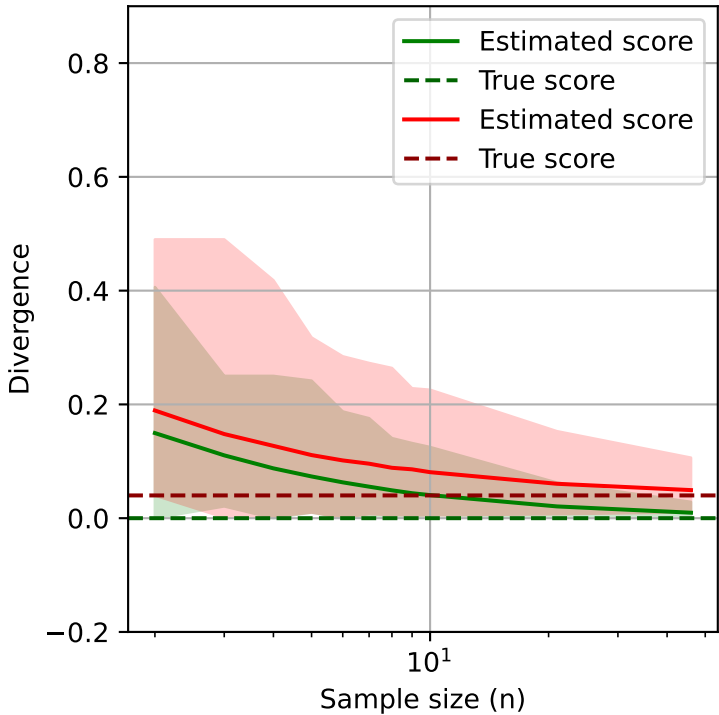

Supplement: supplementary_material [file app_variance_of_divergence.pdf › boeken2025conditional_supplements/figures/app_variance_of_divergence.pdf]

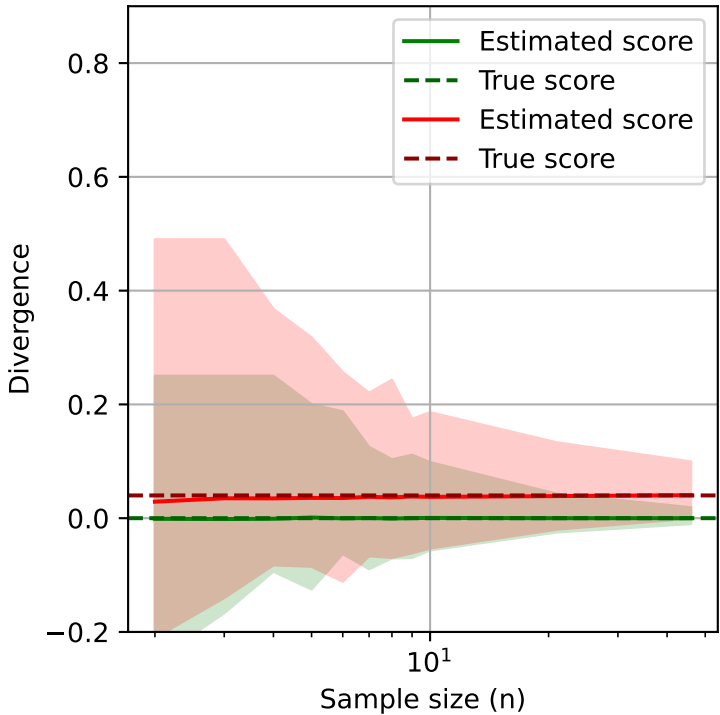

Supplement: supplementary_material [file app_variance_of_divergence_unbiased.pdf › boeken2025conditional_supplements/figures/app_variance_of_divergence_unbiased.pdf]
